# Supplementary material
Source: PubMed Central journal article supplement (PMC5916357)
Supplement: npp2017281x1.pdf [file npp2017281x1.pdf]

## **Supplementary Materials and Methods**

Unconditioned responses to stimulus presentation during acquisition day

During the acquisition trial, unconditioned responses were scored every second for 10 seconds during and 10 seconds after the presentation of the stimulus. Orienting responses to the CS<sup>+</sup> was defined as orientation of the head to the location of the speaker with rearing behavior (lifting of both front paws). Locomotor activity in the 10 second period after the onset of the shock was used as a measure of shock reactivity.
